# Supplementary material
Source: publisher figshare collection journal article supplement (https://rs.figshare.com/ndownloader/files/16437866)
Supplement: Supplementary file [file 16437866]

## 1 **1. RTs processing**

2 The performances were analyzed in terms of RTs. Given that it is well known that the distribution of  
3 RTs is not normal [1,2], we used the natural logarithm transformation of RTs (ln) before trimming  
4 outlier RTs from the analyses. For each subject, each delay and each hemispace separately, we  
5 calculated the mean and the standard deviation of our transformed data. Ln(RTs) were considered  
6 outliers if they exceeded more than two standard deviations from the mean ln(RTs) and trimmed from  
7 the analyses (5.38% of trials for the audience experiment, 5.20% of trials for the collaborative  
8 experiment, 5.62% of trials in the competitive experiment). For the analyses, ln(RTs) were averaged  
9 for each subject and for each of the 44 conditions separately (2 HEMISPACE \* 11 DISTANCE \* 2  
10 CONDITION). The means we obtained were transformed back with an exponential function.

11

## 12 **2. Collaborative experiment**

### 13 **2.1 Outliers' participants**

14 Among the participants, three participants had a high rate of misses in at least one of the social  
15 condition (isolated condition: 10% and 18.1% of miss,  $m \pm sd$  of the sample:  $1.8 \pm 3.8\%$ , in a dyad  
16 condition: 14.5% of miss,  $m \pm sd$  of the sample:  $1.2 \pm 2.7\%$ ) and were therefore excluded from the RTs  
17 analyses. The remaining participants were accurate in performing the task as the rates of omissions  
18 ( $0.70 \pm 1.8\%$ ) can attest. We also excluded one participant from the analyses because his mean RT  
19 was substantially elevated ( $497.67 \pm 127.76ms$ ,  $m \pm sd$  of the sample:  $364.55 \pm 57.88ms$ ), giving us  
20 reason to suspect that he did not correctly perform the task. There were twenty-six remaining subjects  
21 (14 females, age  $24.08 \pm 4.39$ ).

22

### 23 **2.2 Comparison between unimodal and bimodal trials**

24 We first verified that multisensory integration globally speed up tactile detection in bimodal trials  
25 compared to unimodal trials. We conducted an ANOVA on the mean RTs, with the within subject  
26 factors DELAY (11 levels: Tactile\_Before, T1, T2, T3, T4, T5, T6, T7, T8, T9 and Tactile\_After).  
27 The global effect of DELAY was significant ( $F_{(10,250)} = 61.23, p < .001, \eta_p^2 = .710$ ) suggesting that RTs  
28 were influenced by the time of tactile stimulation delivery (see figure S1 panel a).

29 RTs in the unimodal trials Tactile\_Before were significantly slower than RTs in the bimodal  
30 trials T2, T3, T4, T5, T6, T7, T8 and T9 (Post-hoc Newman-Keuls' test:  $p < .001$  in all cases,  
31 suggesting that sound presence boosted tactile detection at those delays. RTs at Tactile\_Before did not  
32 significantly differ from RTs in the bimodal trials at T1 (Post-hoc Newman-Keuls' test:  $p = .967$ ). RTs

33 in the bimodal trials at T1 were also significantly slower than all the other RTs in the bimodal trials (at  
34 T2, T3, T4, T5, T6, T7, T8 and T9; Post-hoc Newman-Keuls' test:  $p < .001$  in all cases) suggesting  
35 that, even though the sound started at the same time as the tactile stimulus delivery in that condition,  
36 there was no multisensory integration. Thus, RTs at T1 were excluded from the rest of the analysis.

37 RTs in the unimodal trials Tactile\_After were significantly faster than RTs at Tactile\_Before  
38 (Post-hoc Newman-Keuls' test:  $p < .001$ ). Given that RTs at Tactile\_After were significantly slower  
39 than RTs at T7, T8 and T9 (Post-hoc Newman-Keuls' test:  $p < .001$ ), we can exclude the possibility  
40 that participants were faster at late delays because of the increasing probability of receiving a tactile  
41 stimulation along trial.

42

### 43 **2.3 Verification of the anisotropy of lateral PPS**

44 We verified PPS anisotropy [3] by examining the effect of HEMISPACE on bimodal RTs. We  
45 conducted an ANOVA on the mean RTs with the within-subjects factors HEMISPACE (2 levels:  
46 Left/Right) and DELAY (8 levels: T2, T3, T4, T5, T6, T7, T8 and T9). The ANOVA revealed a  
47 significant main effect of DELAY ( $F_{(7,175)} = 42.29$ ,  $p < .001$ ,  $\eta_p^2 = .629$ ). The analysis also revealed that  
48 the two-way interaction HEMISPACE x DELAY was significant ( $F_{(7,175)} = 5.17$ ,  $p < .001$ ,  $\eta_p^2 = .171$ ),  
49 indicating that tactile detections were dependent on the temporal delay of tactile stimulation delivery  
50 from sound onset and the hemispace of origin of the sound source. The effect of the factor  
51 HEMISPACE was not significant. Thus, we analyzed the effect of the social manipulation with the  
52 other factors separately on the left and on the right PPS boundaries.

## 53 **3. Competitive experiment**

### 54 **3.1 Outliers' participants**

55 Among the participants, one had a high rate of misses (5.45% of miss,  $m \pm sd$  of the sample  $1.24 \pm$   
56  $1.08\%$ ) and was therefore excluded from the analyses. The 29 remaining participants (16 females, age  
57  $m \pm sd$ :  $23.45 \pm 4.15$ ) were accurate in performing the task.

58

### 59 **3.2 Comparison between unimodal and bimodal trials**

60 We first verified that multisensory integration globally speed up tactile detection in bimodal trials  
61 compared to unimodal trials. We conducted an ANOVA on the mean RTs, with the within subject  
62 factors DELAY (11 levels: Tactile\_Before, T1, T2, T3, T4, T5, T6, T7, T8, T9 and Tactile\_After).  
63 The global effect of DELAY was significant ( $F_{(10,280)} = 76.34$ ,  $p < .001$ ,  $\eta_p^2 = .732$ ) suggesting that RTs

64 were influenced by the time of tactile stimulation delivery (see figure S1 panel b).

65 RTs in the unimodal trials Tactile\_Before were significantly slower than RTs in the bimodal  
66 trials T2, T3, T4, T5, T6, T7, T8 and T9 (Post-hoc Newman-Keuls' test:  $p < .001$  in all cases),  
67 suggesting that sound presence boosted tactile detection at those delays. RTs at Tactile\_Before also  
68 significantly differed from RTs in the bimodal trials at T1 (Post-hoc Newman-Keuls' test:  $p = .011$ ).  
69 RTs in the bimodal trials at T1 were also significantly slower than all the other RTs in the bimodal  
70 trials (at T2, T3, T4, T5, T6, T7, T8 and T9; Post-hoc Newman-Keuls' test:  $p < .001$  in all). Thus T1  
71 significantly differed from Tactile\_Before, but also to all other bimodal trials. The expected behavioral  
72 effect of multisensory is an acceleration of RTs around 25ms at least (as seen in the other two  
73 experiments, and in the literature [4,5]). As Tactile\_Before differs from T1 of 7ms and from T2 of  
74 24ms, it is likely that the stimulation was not perceived as bimodal. Thus, T1 was excluded of the rest  
75 of the analysis.

76 RTs in the unimodal trials Tactile\_After were significantly faster than RTs at Tactile\_Before  
77 (Post-hoc Newman-Keuls' test:  $p < .001$ ). Given that RTs at Tactile\_After were significantly slower  
78 than RTs at T7, T8 and T9 (Post-hoc Newman-Keuls' test:  $p < .001$ ), we can exclude the possibility  
79 that participants were faster at late delays because of the increasing probability of receiving a tactile  
80 stimulation along trial.

81

### 82 **3.3 Verification of the anisotropy of lateral PPS**

83 We verified PPS anisotropy [3] by examining the effect of HEMISPACE on bimodal RTs. We  
84 conducted an ANOVA on the mean RTs with the within-subjects factors HEMISPACE (2 levels:  
85 Left/Right) and DELAY (8 levels: T2, T3, T4, T5, T6, T7, T8 and T9). The ANOVA revealed a main  
86 significant effect of DELAY ( $F_{(7,196)} = 44.27$ ,  $p < .001$ ,  $\eta_p^2 = .613$ ). The analysis also revealed that the  
87 two-way interaction HEMISPACE x DELAY was significant ( $F_{(7,196)} = 2.90$ ,  $p < .01$ ,  $\eta_p^2 = .094$ ),  
88 indicating that tactile detections were dependent on the temporal delay of tactile stimulation delivery  
89 from sound onset and the hemispace of origin of the sound source. The effect of the factor  
90 HEMISPACE was not significant. Thus, we analyzed the effect of the social manipulation with the  
91 other factors separately on the left and on the right PPS boundaries.

92

## 93 **4. Audience experiment**

### 94 **4.1 Outliers' participants**

95 Among the 28 participants who took part to the Audience experiment, two had a high rate of misses in

96 at least one of the two social conditions (Isolated condition: 15.9% of miss,  $m \pm sd$  of the sample:  $1.4 \pm$   
97  $3.1\%$ ; In Dyad condition: 17.3% and 28% of miss,  $m \pm sd$  of the sample:  $2.7 \pm 6.4\%$ ) and were  
98 therefore excluded from the RTs analyses. The 26 remaining participants (11 females, age  $m \pm sd$ :  
99  $25.27 \pm 3.58$ ) were accurate in performing the task as the rates of omissions ( $0.87 \pm 2.0\%$ ) can attest.

100

## 101 **4.2 Comparison between unimodal and bimodal trials**

102 We first verified that multisensory integration globally speed up tactile detection in bimodal trials  
103 compared to unimodal trials. We conducted an ANOVA on the mean RTs, with the within subject  
104 factors DELAY (11 levels: Tactile\_Before, T1, T2, T3, T4, T5, T6, T7, T8, T9 and Tactile\_After).  
105 The global effect of DELAY was significant ( $F_{(10,250)} = 50.30$ ,  $p < .001$ ,  $\eta_p^2 = .668$ ) suggesting that  
106 RTs were influenced by the time of tactile stimulation delivery (see figure S1 panel c).

107 RTs in the unimodal trials Tactile\_Before were significantly slower than RTs in the bimodal  
108 trials T2, T3, T4, T5, T6, T7, T8 and T9 (Post-hoc Newman-Keuls' test:  $p < .001$  in all cases),  
109 suggesting that sound presence boosted tactile detection at those delays. RTs at Tactile\_Before did not  
110 significantly differ from RTs in the bimodal trials at T1 (Post-hoc Newman-Keuls' test:  $p = .260$ ). RTs  
111 in the bimodal trials at T1 were also significantly slower than all the other RTs in the bimodal trials (at  
112 T2, T3, T4, T5, T6, T7, T8 and T9; Post-hoc Newman-Keuls' test:  $p < .001$  in all cases) suggesting  
113 that, even though the sound started at the same time as the tactile stimulus delivery in that condition,  
114 the auditory stimulus was not perceived by participants. Thus, RTs at T1 were excluded from the rest  
115 of the analysis.

116 RTs in the unimodal trials Tactile\_After were significantly faster than RTs at Tactile\_Before  
117 (Post-hoc Newman-Keuls' test:  $p < .001$ ). Given that RTs at Tactile\_After were significantly slower  
118 than RTs at T7, T8 and T9 (Post-hoc Newman-Keuls' test:  $p < .02$ ), we can exclude the possibility that  
119 participants were faster at late delays because of the increasing probability of receiving a tactile  
120 stimulation along trial.

121

## 122 **4.3 Verification of the anisotropy of lateral PPS**

123 We verified PPS anisotropy [3] by examining the effect of HEMISPACE on bimodal RTs. We  
124 conducted an ANOVA on the mean RTs with the within-subjects factors HEMISPACE (2 levels:  
125 Left/Right) and DELAY (8 levels: T2, T3, T4, T5, T6, T7, T8 and T9). The ANOVA revealed a main  
126 significant effect of DELAY ( $F_{(7,175)} = 35.99$ ,  $p < .001$ ,  $\eta_p^2 = .590$ ). The analysis also revealed that the  
127 two-way interaction HEMISPACE x DELAY was marginally significant ( $F_{(7,175)} = 1.81$ ,  $p = .08$ ,  $\eta_p^2 =$   
128  $.067$ ), suggesting that tactile detections might be dependent on the temporal delay of tactile

129 stimulation delivery from sound onset and the hemispace of origin of the sound source. The effect of  
130 the factor HEMISPACE was not significant. Thus, according to the results of the two precedents  
131 experiences and of the literature, we analyzed the effect of the social manipulation with the other  
132 factors separately on the left and on the right PPS boundaries.

133

## 134 **References**

- 135 1. Luce RD. 1986 *Response times: Their role in inferring elementary mental organization (No. 8)*. Oxford  
136 Uni.
- 137 2. Ulrich R, Miller J. 1993 Information processing models generating lognormally distributed reaction  
138 times. *J. Math. Psychol.* **37(4)**, 513.
- 139 3. Hobeika L, Viaud-Delmon I, Taffou M. 2018 Anisotropy of lateral peripersonal space is linked to  
140 handedness. *Exp. brain Res.* **236**, 609–618.
- 141 4. Canzoneri E, Magosso E, Serino A. 2012 Dynamic sounds capture the boundaries of peripersonal space  
142 representation in humans. *PLoS One* **7**, e44306. (doi:10.1371/journal.pone.0044306)
- 143 5. Taffou M, Viaud-Delmon I. 2014 Cynophobic Fear Adaptively Extends Peri-Personal Space. *Front.*  
144 *Psychiatry* **5**, 3–9. (doi:10.3389/fpsy.2014.00122)

145

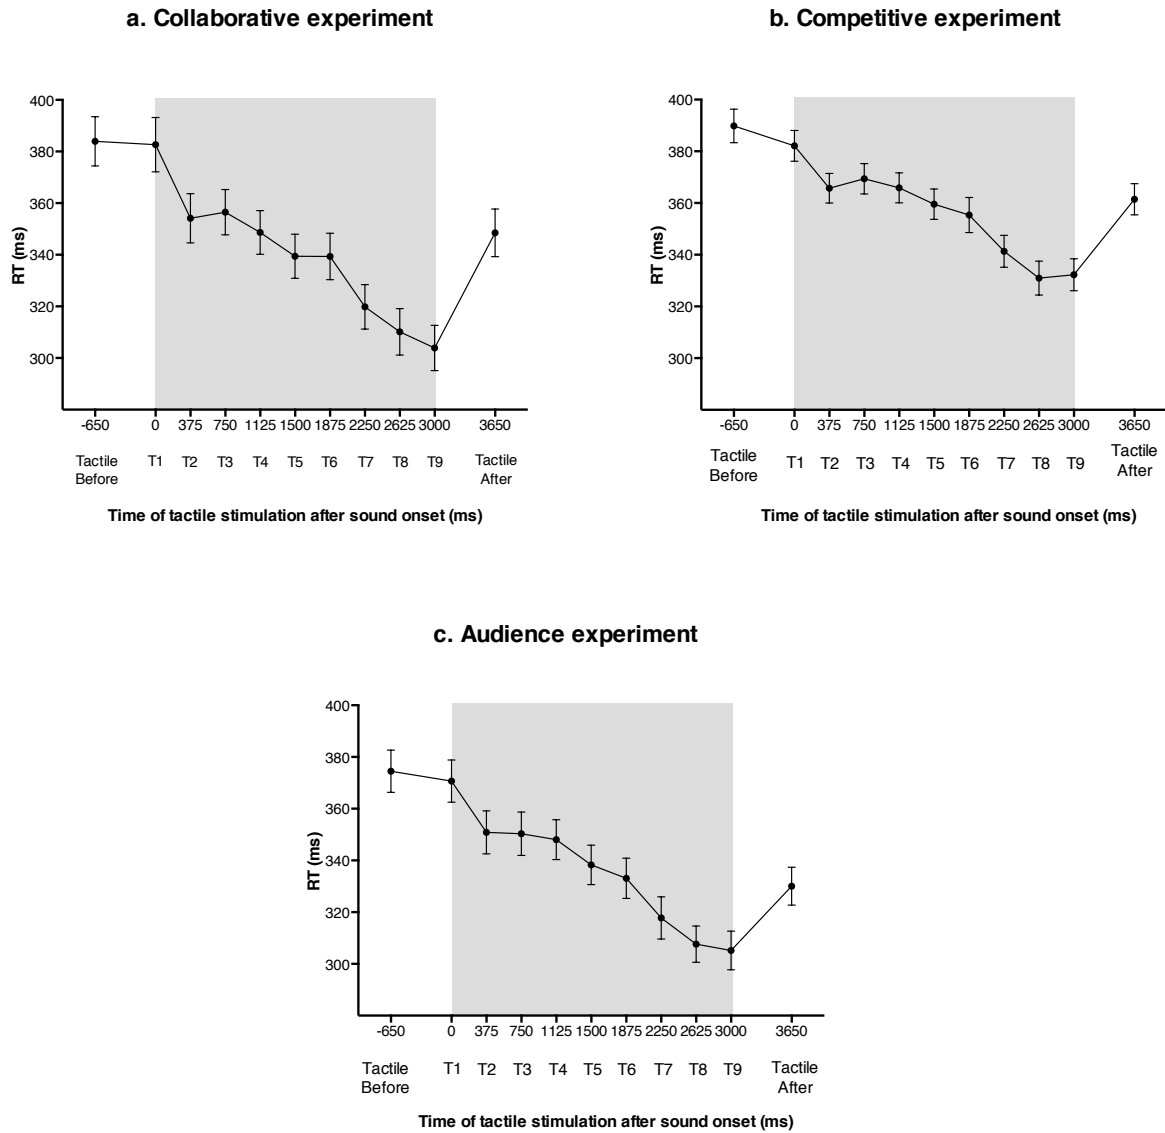

146

147 **Figure S1. Impact of sound presence on tactile detection.** Those figures reports participants' mean  
 148 tactile reaction times ( $\pm$ SEM) as a function of the delay of tactile stimulation delivery from sound  
 149 onset, on bimodal trials (from T1 corresponding at the sound onset, when the sound is the furthest  
 150 from participants' body to T9 corresponding to the moment when the sound is the closest from  
 151 participants' body) and on unimodal trials (Tactile\_Before, Tactile\_After) in the collaborative  
 152 experiment (**panel a**), the competitive experiment (**panel b**), and the audience experiment (**panel c**).  
 153 The shaded region indicated the duration of the sound. Sound presence boosted tactile detection in  
 154 bimodal trials, expect in T1 in which tactile stimulation occurred at sound onset.
